# Supplementary material
Source: HighWire-hosted journal article supplement (https://erj.ersjournals.com/content/51/4/1702258)
Supplement: inline-supplementary-material-1 [file inline-supplementary-material-1.pdf]

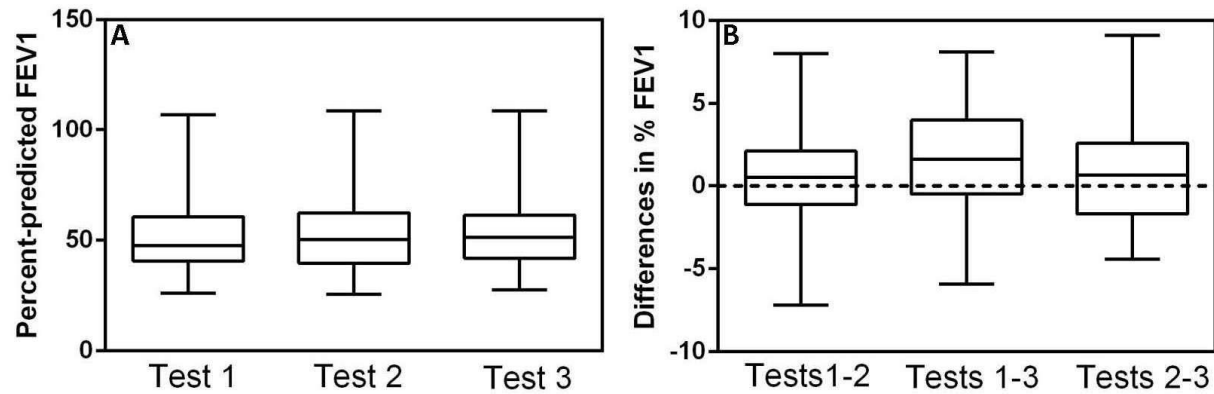

Figure S1: Box-and-whiskers plot showing percent-predicted FEV<sub>1</sub> values for each of three successive tests (Panel A), and differences between each two tests (Panel B) expressed as percent-predicted FEV<sub>1</sub> (Panel B) in 46 patients with LAM. The bottom line of each box represents the first quartile. The top line represents the third quartile and the line across the boxes represents the second quartile (median). The upper and lower whiskers indicate the maximum and minimum FEV<sub>1</sub> values. Panel A: There were no statistically significant differences in percent-predicted FEV<sub>1</sub> among the three tests. Panel B: The mean differences between the first and second test was  $0.7 \pm 3.0$  % predicted (range, -7, 8). For the first and third test the difference was  $1.6 \pm 3.1$  % predicted (range, -5.9, 7.1) and for the second and third test the difference was  $0.9 \pm 3.3$  % predicted (range, -4.4, 9.1). The differences between the three tests were very small, however, minimum and maximal differences between the first and the second test reached -7 % and +8 %, respectively.
