# Supplementary material
Source: HighWire-hosted journal article supplement (https://erj.ersjournals.com/content/51/4/1702258)
Supplement: inline-supplementary-material-2 [file inline-supplementary-material-2.pdf]

**Table S1. Changes in FEV<sub>1</sub> and DL<sub>CO</sub> over time preceding their decline to values ≤70 % predicted in 36 patients with LAM and FEV<sub>1</sub> or DL<sub>CO</sub> > 70 % predicted**

|                                                | <b>Patients with decline in FEV<sub>1</sub> to ≤ 70 %</b> | <b>Patients with decline in DLCO to ≤ 70 %</b> |
|------------------------------------------------|-----------------------------------------------------------|------------------------------------------------|
| Number of patients                             | 16                                                        | 20                                             |
| Years of observation                           | 8.3±4.5                                                   | 7.4±4.8                                        |
| Initial FEV <sub>1</sub>                       | 2.5±0.5                                                   | 2.4±0.5                                        |
| Initial % FEV <sub>1</sub>                     | 87±13                                                     | 88.2±19                                        |
| Initial DL <sub>CO</sub>                       | 17.1±4.9                                                  | 17.8±2.8                                       |
| Initial % DL <sub>CO</sub>                     | 78±19                                                     | 83±11                                          |
| Change in FEV <sub>1</sub> (ml/year)           | -88±11                                                    | -93±13                                         |
| Change in FEV <sub>1</sub> (% predicted/year)  | -2.4±0.3                                                  | -2.2±0.4                                       |
| Change in DL <sub>CO</sub> (ml/min/mmHg)       | -0.65±0.07                                                | -0.74±0.09                                     |
| Change in DL <sub>CO</sub> (% predicted /year) | -2.5±0.3                                                  | -2.9±0.4                                       |
| Final FEV <sub>1</sub>                         | 1.8±0.2                                                   | 1.9±0.5                                        |
| Final % FEV <sub>1</sub>                       | 68±1.8                                                    | 75±23                                          |
| Final DL <sub>CO</sub>                         | 13.4±3.7                                                  | 13.3±2.8                                       |
| Final % DL <sub>CO</sub>                       | 64.3±17.0                                                 | 67.4±2.5                                       |
| Treated with sirolimus                         | 8                                                         | 6                                              |
